# Supplementary material
Source: PubMed Central journal article supplement (PMC8765424)
Supplement: jb.00380-21-s0003.pdf [file jb.00380-21-s0003.pdf]

## SUPPLEMENTAL MATERIAL for Djami-Tchatchou, et. al

**Supplemental Table 1.** RNA-seq Data (Excel file).

**Supplemental Table 2.** COG assignments for differentially expressed genes (Excel File)

### Supplemental Table 3. Primers used in this study

| Gene                            | Forward primer (5'-3')       | Reverse primer (5'-3')    | Reference                    |
|---------------------------------|------------------------------|---------------------------|------------------------------|
| PSPTO_0371<br>( <i>iaaL</i> )   | GTCTGGGCATCATTCAAC           | ACGGTCACCAGTTCTTT         | This study                   |
| PSPTO_0537<br>( <i>rpoD</i> )   | GAAGTTGACGAAAGCTGGACCG       | CGACGGTTGATGTCCTTGATCTC   | Djami-Tchatchou et al., 2020 |
| PSPTO_0905<br>( <i>hopAH1</i> ) | GGGTTATAAAGGCGACATC          | ATTGAGCGGCGTATTTG         | This study                   |
| PSPTO_1336                      | GTGTGTGTCACATATTCAGG         | TACGTCCACTTGCCAAT         | This study                   |
| PSPTO_1389<br>( <i>hrcC</i> )   | CAGCCTTCAAGTGATTCC           | GTCATTGATCGTCGACAC        | This study                   |
| PSPTO_1404<br>( <i>hrpL</i> )   | TCAGGAAAGCTGGGAAGACGAA<br>GT | ATGTTTCGACGGCAGGCAATCAATG | Anderson et al., 2014        |
| PSPTO_1483                      | GAAGCACTGTTGAGGTTG           | CGAACTCGGTGGGTATT         | This study                   |
| PSPTO_1767<br>( <i>ohr</i> )    | GATTCTCGACGTCAAAGCTG         | TTCAAAGCGCCGATAAAG        | This study                   |
| PSPTO_1824                      | AGCTTTATTAGTGGCATTGG         | GTTGAGCAGCCACTTTG         | This study                   |
| PSPTO_1873<br>( <i>gntR</i> )   | CCGGGACGAACAGATTTA           | GCAAGACCTTGCGAATG         | This study                   |
| PSPTO_2683                      | ATGACCAAGGTACACATCAT         | GCTCGCCATCCTGAATC         | This study                   |
| PSPTO_3100<br>( <i>mexF</i> )   | GTTGTTACCAGCTACAC            | GCAGGGTGTGCAAGATA         | This study                   |
| PSPTO_3549<br>( <i>aefR</i> )   | GCCTCACCGATCAGAAA            | GTCCATGCTGGTGATCT         | This study                   |
| PSPTO_3617                      | GGTCACCTACGGGATTT            | GCCACTTTGACCTGATG         | This study                   |
| PSPTO_3749                      | GTCGTCAGGTACGTCTG            | GCACTTTGGTGAGAATCC        | This study                   |
| PSPTO_4001<br>( <i>avrPto</i> ) | ATGACGGGAGCGTCAGGAATCA<br>AT | ATCCGTTCCGGTTCATAGTCGCAA  | Anderson et al., 2014        |
| PSPTO_4033<br>( <i>recA</i> )   | TAGAACTTCAGCGCGTTACC         | GCCAACTGCCTGGTTATCT       | Smith et al., 2018           |
| PSPTO_4233                      | TGTCCATACCGAAGAAGAG          | GGATGCTGCTGAGTATGA        | This study                   |
| PSPTO_4297                      | CTTTCTCTGTTCTGGCTTC          | GGGAGGCTTTGGACATA         | This study                   |
| PSPTO_4530<br>( <i>katG</i> )   | CACGCGAACGAAGAAAG            | CTTCCGGGTTACATAGA         | This study                   |
| PSPTO_4851                      | GCATCTCCATCGAGTACA           | GGTAATACCGGCTGAGAA        | This study                   |

## REFERENCES

Anderson JC, Wan Y, Kim YM, Pasa-Tolic L, Metz TO, Peck SC. 2014. Decreased abundance of type III secretion system-inducing signals in *Arabidopsis mkp1* enhances resistance against *Pseudomonas syringae*. *Proc Natl Acad Sci U S A* 111:6846-51.

Djami-Tchatchou AT, Harrison GA, Harper CP, Wang R, Prigge MJ, Estelle M, Kunkel BN. 2020. Dual role of auxin in regulating plant defense and bacterial virulence gene expression during *Pseudomonas syringae* PtoDC3000 pathogenesis. *Mol Plant Microbe Interact* 33:1059-1071.

Smith A, Lovelace AH, Kvitko BH. 2018. Validation of RT-qPCR approaches to monitor *Pseudomonas syringae* gene expression during infection and exposure to pattern-triggered immunity. *Mol Plant Microbe Interact* 31: 410-19.

## SUPPLEMENTAL FIGURES and FIGURE LEGENDS

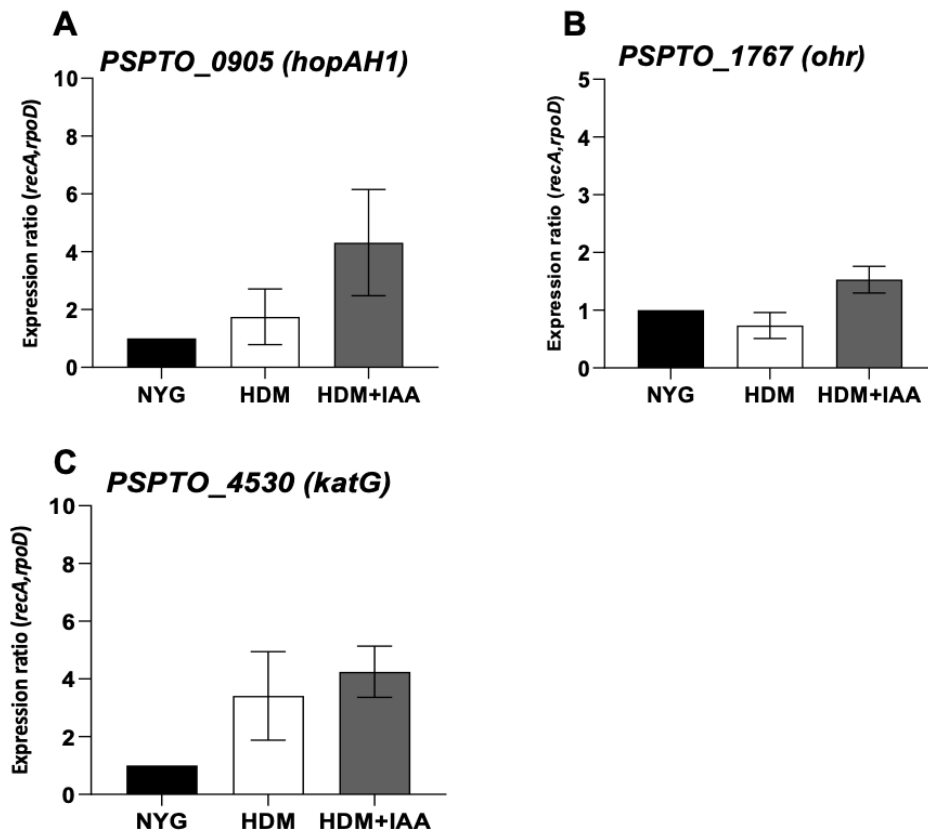

### Supplemental Fig. 1 Expression of selected genes not confirmed to be up-regulated by IAA in culture.

Expression of genes **(A)** *PSPTO\_0905 (hopAH1)* **(B)** *PSPTO\_1767 (ohr)*, and **(C)** *PSPTO\_4530 (katG)*; 30 min after being transferred from NYG to HDM or HDM containing 100  $\mu$ M IAA (HDM+IAA). Expression levels in cells growing in NYG was used as the calibrator for relative expression. The relative expression was calculated using the reference genes *rpoD* and *recA*. Each data point represents the average of 3 biological replicates, and error bars representing the SEM between biological replicates. Results were analyzed using ANOVA, followed by a Tukey's post test.

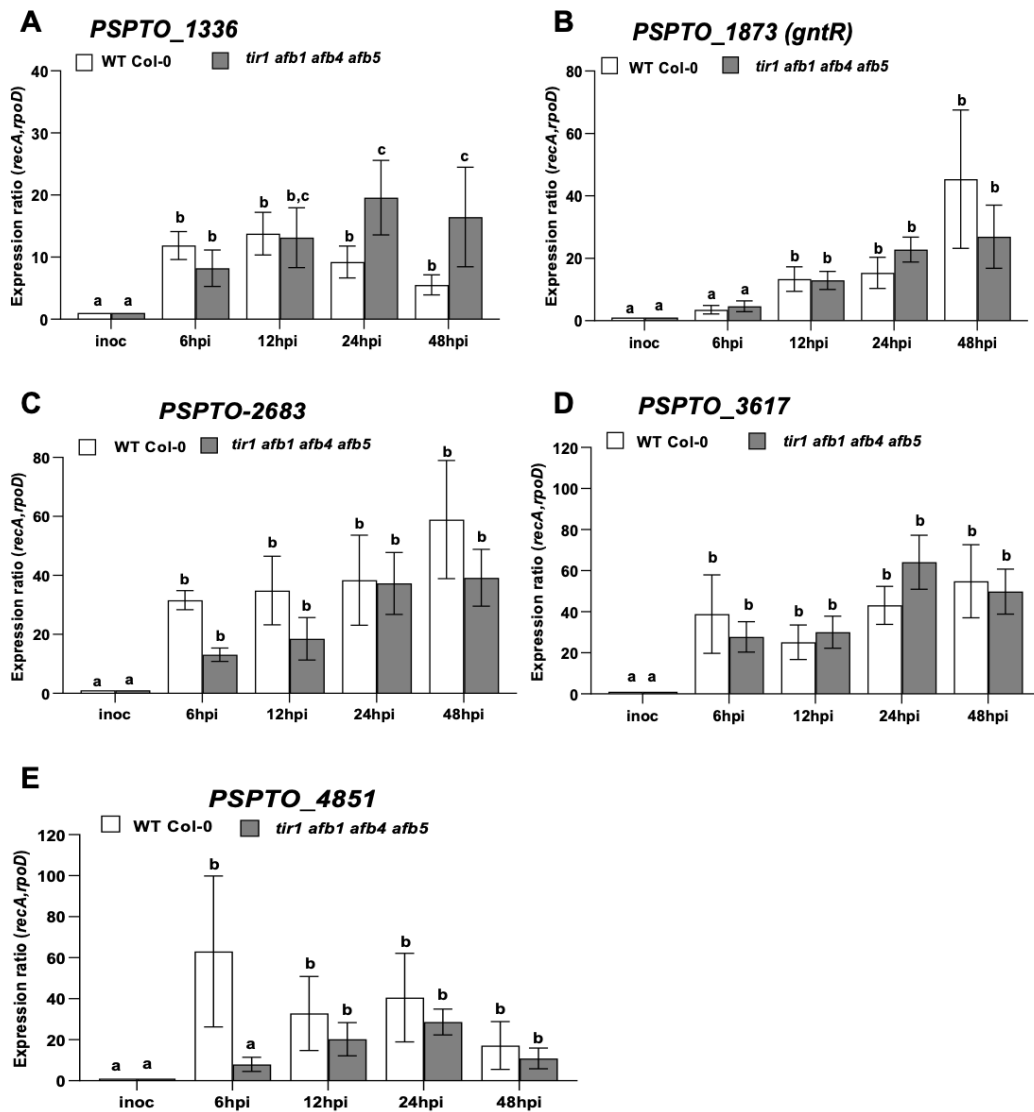

**Supplemental Fig. 2. Expression in *planta* of additional genes up-regulated by IAA in culture.** Expression of bacterial genes (A) *PSPTO\_1336*, (B) *PSPTO\_1873 (gntR)* (C) *PSPTO\_2683*, (D) *PSPTO\_3617* and (E) *PSPTO\_4851* in *PtoDC3000* growing in *A. thaliana* WT Col-0 or *tir1afb1afb4afb5* mutant plants. Infected leaves were harvested 6, 12, 24 and 48 hours after inoculation, and total RNA isolated and used for qRT-PCR to quantify bacterial gene expression. RNA prepared from the *PtoDC3000* cell suspension used for the inoculum was used as the calibrator for relative expression. The data shown were compiled from 2 (A) or 3 (B-E) independent experiments, carried out on different days. The relative expression was calculated using the reference genes *recA* and *rpoD*.

Each data point is the average of 6 or 9 biological replicates, and error bars represent the SEM between biological replicates. Results were analyzed using ANOVA, followed by a Tukey's post test. Different letters indicate significant difference between samples with  $p < 0.05$ .
